# Supplementary material for: Cyclometallated iridium NHC complexes containing self-isomerised ligands as catalysts for hydrosilylation and transfer hydrogenation reactions
Source: Royal Society of Chemistry journal article supplement (doi:10.1039/d2nj05727a), 2023-01-01
Supplement: d2nj05727a1.pdf [file d2nj05727a1.pdf]

## Cyclometallated iridium NHC complexes containing self-isomerised ligands as catalysts for hydrosilylation and transfer hydrogenation reactions

Estefan van Vuuren, Frederick P. Malan, Marilé Landman\*

*Department of Chemistry, University of Pretoria, Hatfield, Pretoria, South Africa, 0002*

### Supporting Information

1.  $^1\text{H}$ ,  $^{13}\text{C}$ , and selected 2D (HSQC, COSY) NMR spectra of the iridium complexes (**Figures S1-S12**).
2. Crystallographic data and structure refinement parameters (**Tables S1-S3**).
3. Conversion versus time plot for transfer hydrogenation using **3** (**Graph S1**).
4.  $^1\text{H}$  NMR spectrum of catalysis reaction mixture of hydrosilylation obtained in  $\text{C}_6\text{D}_6$  (**Figure S13**).
5.  $^1\text{H}$  NMR spectrum of catalysis reaction mixture of transfer hydrogenation obtained in  $\text{CDCl}_3$  (**Figure S14**).
6.  $^1\text{H}$  NMR spectrum of silver biscarbene formed from **L1** (**Figure S15**).
7. Proposed mechanism for the hydrosilylation using Ir(III) catalysts (**Figure S16**).



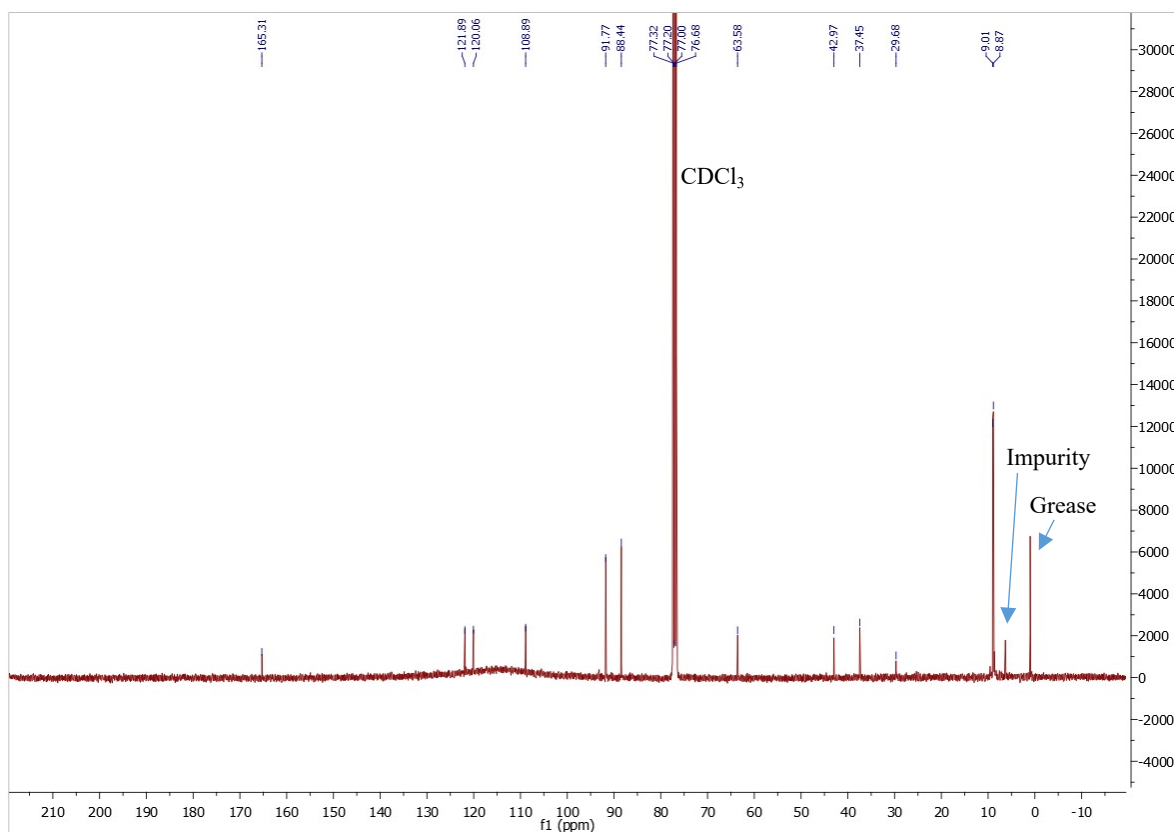

**Figure S2 Complex 1:  $^{13}\text{C}$  NMR spectrum**

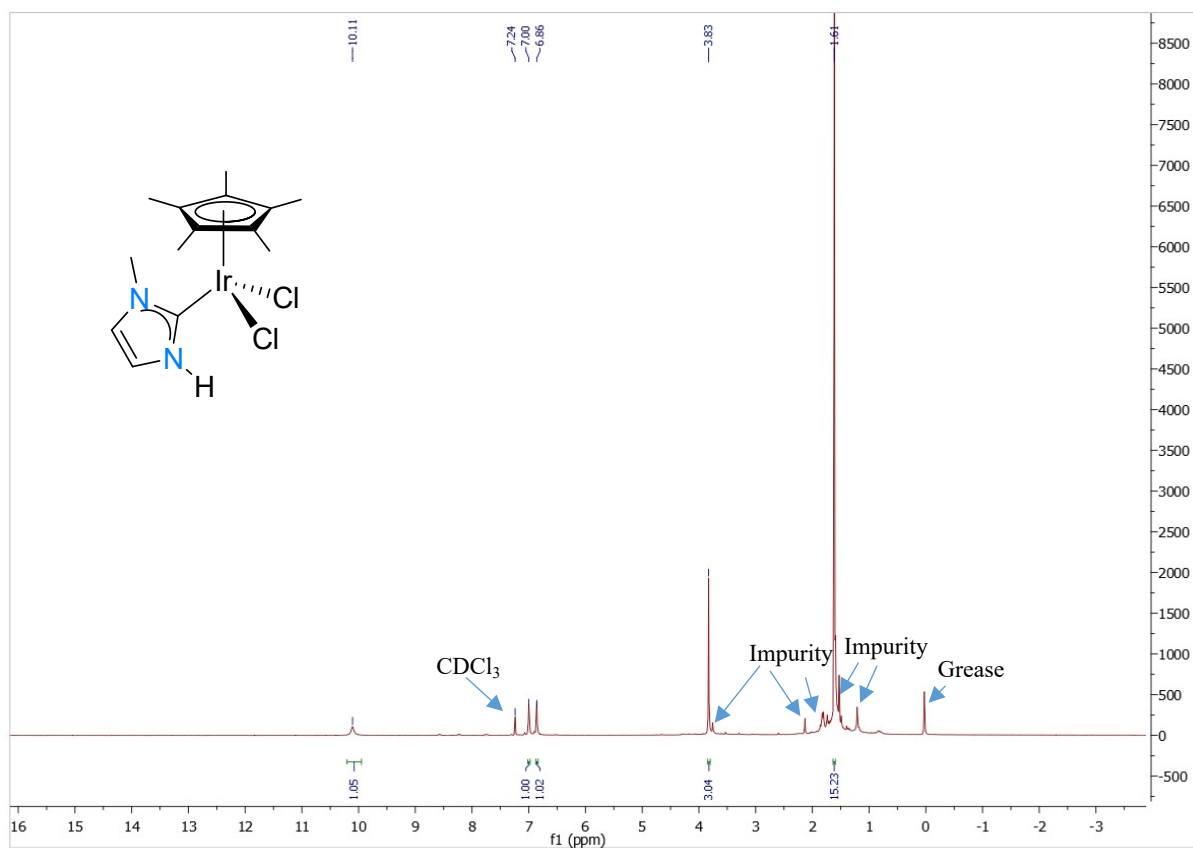

**Figure S3 Complex 1b:  $^1\text{H}$  NMR spectrum**

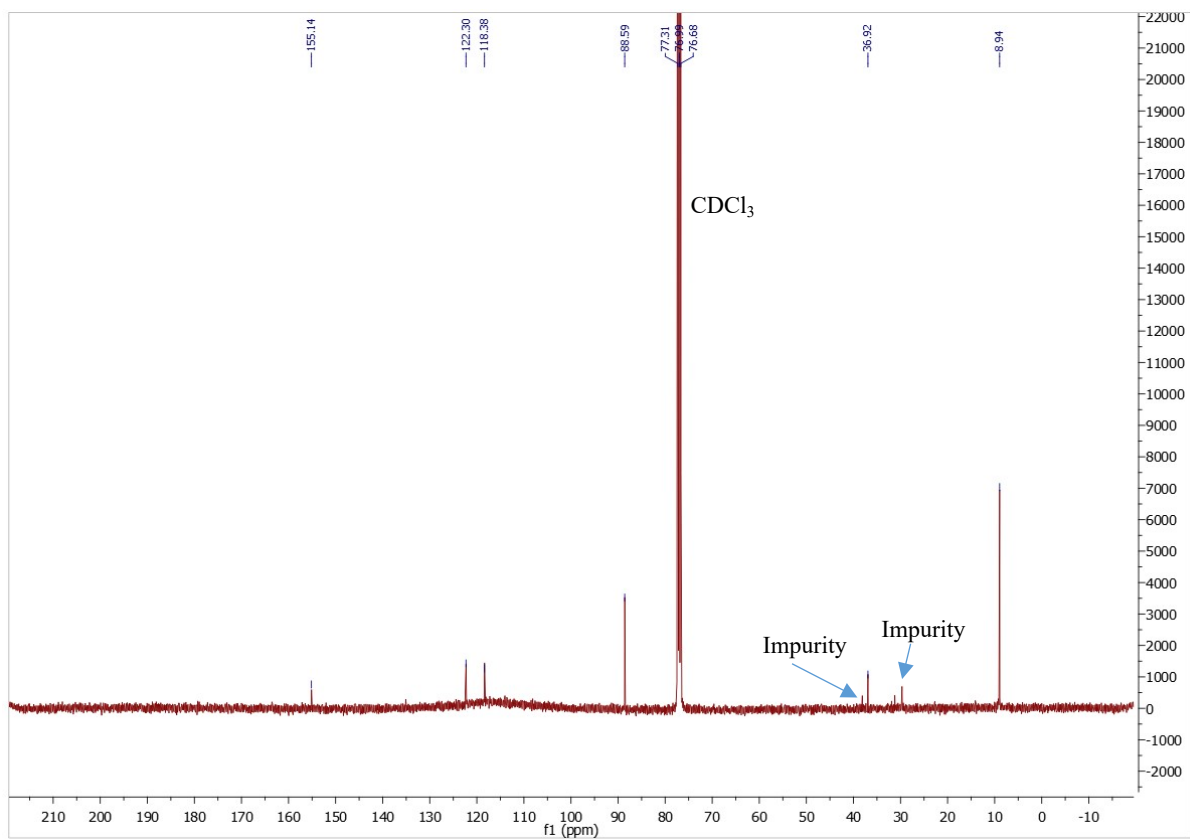

**Figure S4 Complex 1b:** <sup>13</sup>C NMR spectrum

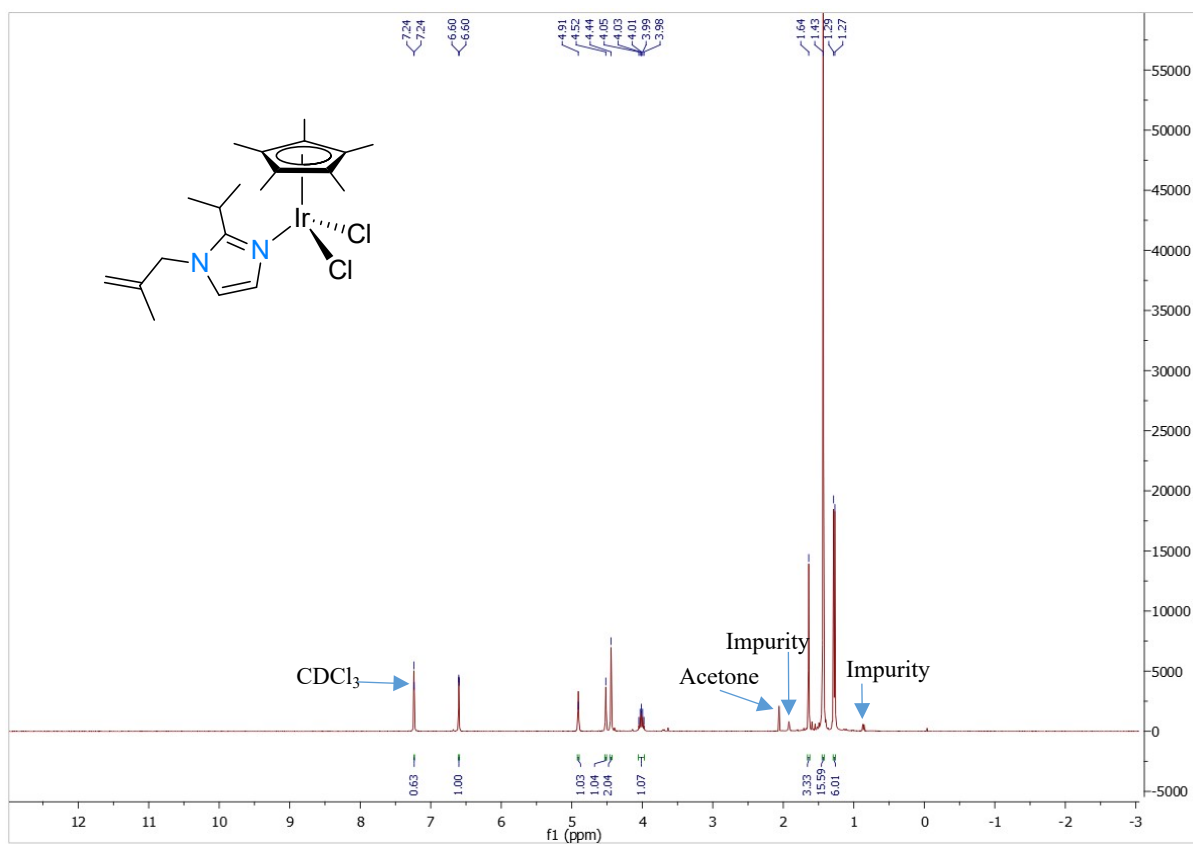

**Figure S5 Complex 2:** <sup>1</sup>H NMR spectrum

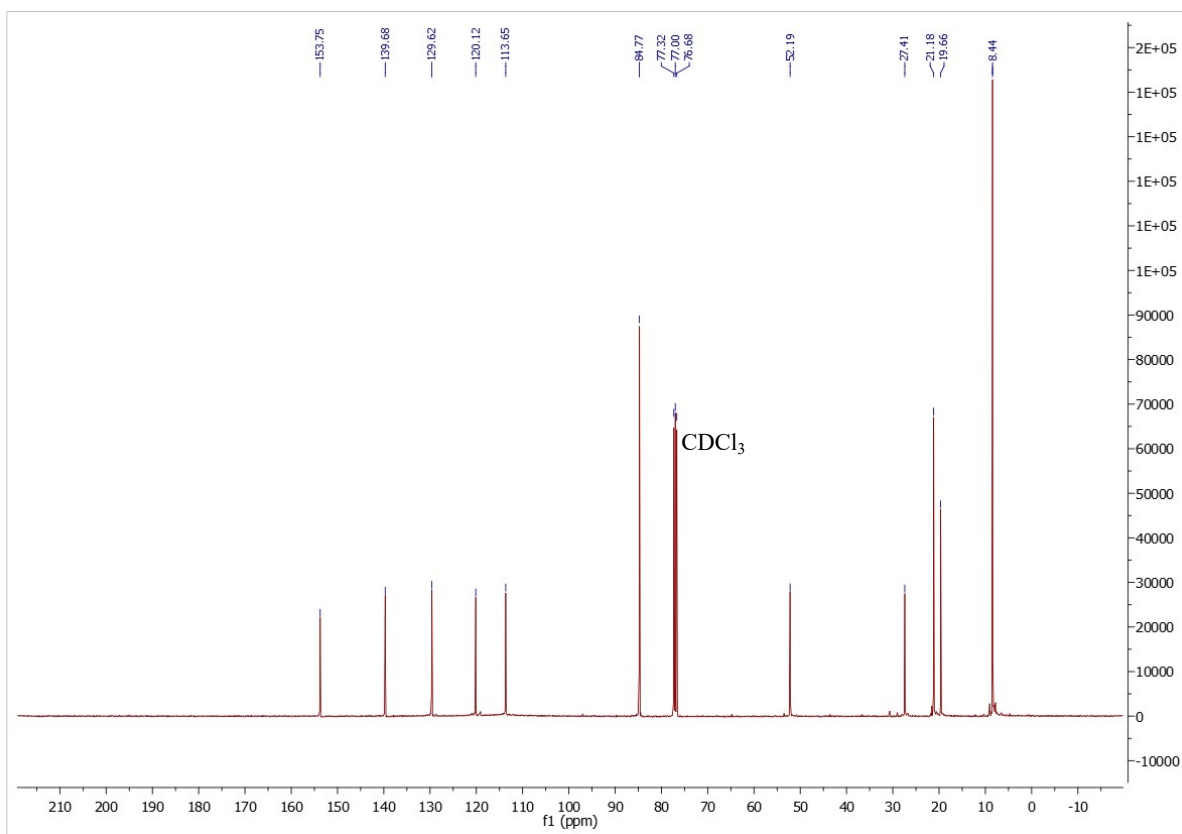

Figure S6 Complex 2:  $^{13}\text{C}$  NMR spectrum

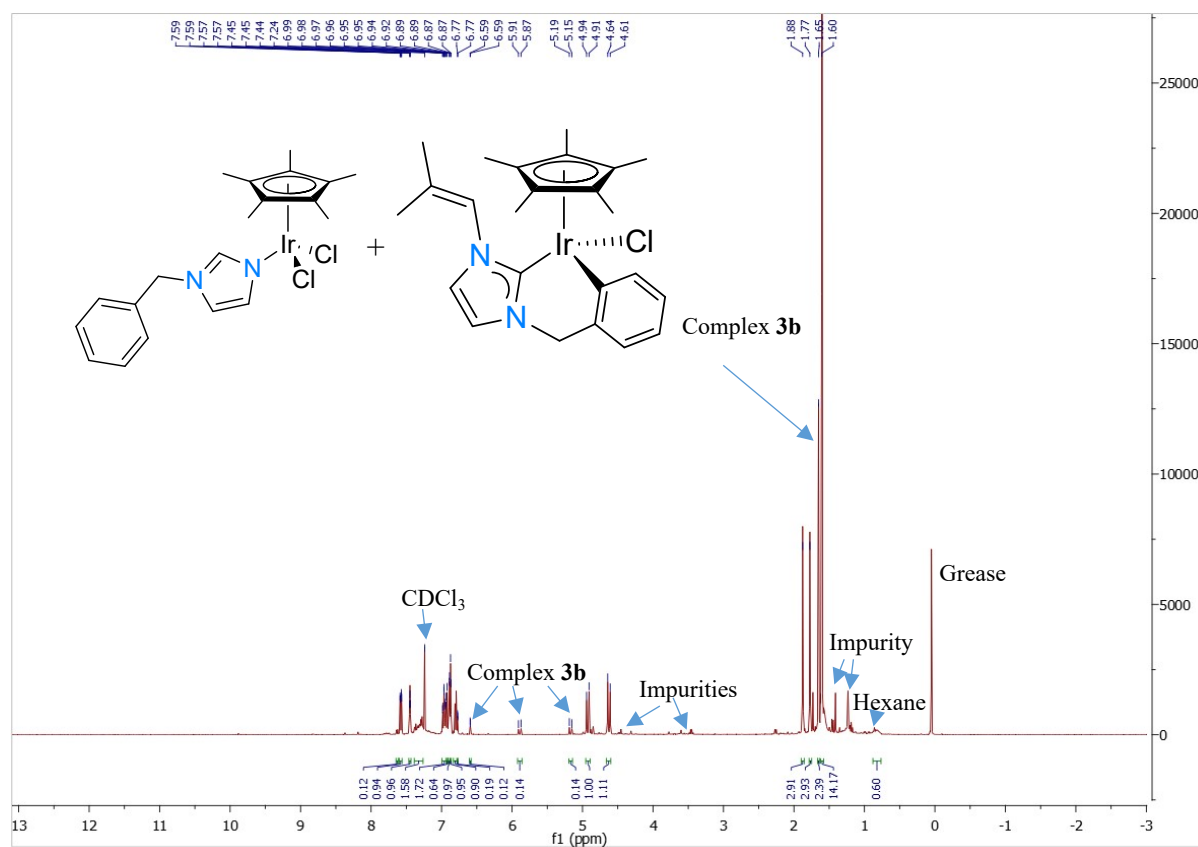

Figure S7 Complex 3:  $^1\text{H}$  NMR spectrum

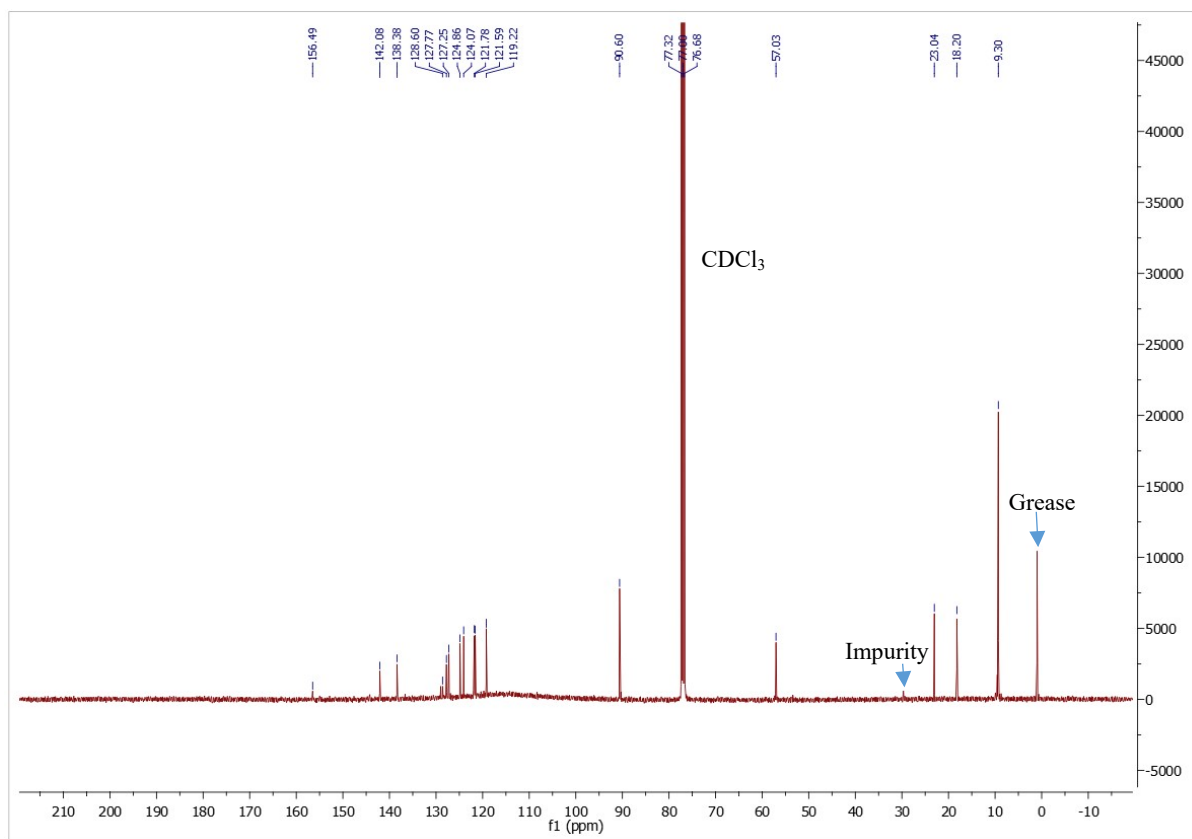

**Figure S8 Complex 3:  $^{13}\text{C}$  NMR spectrum**

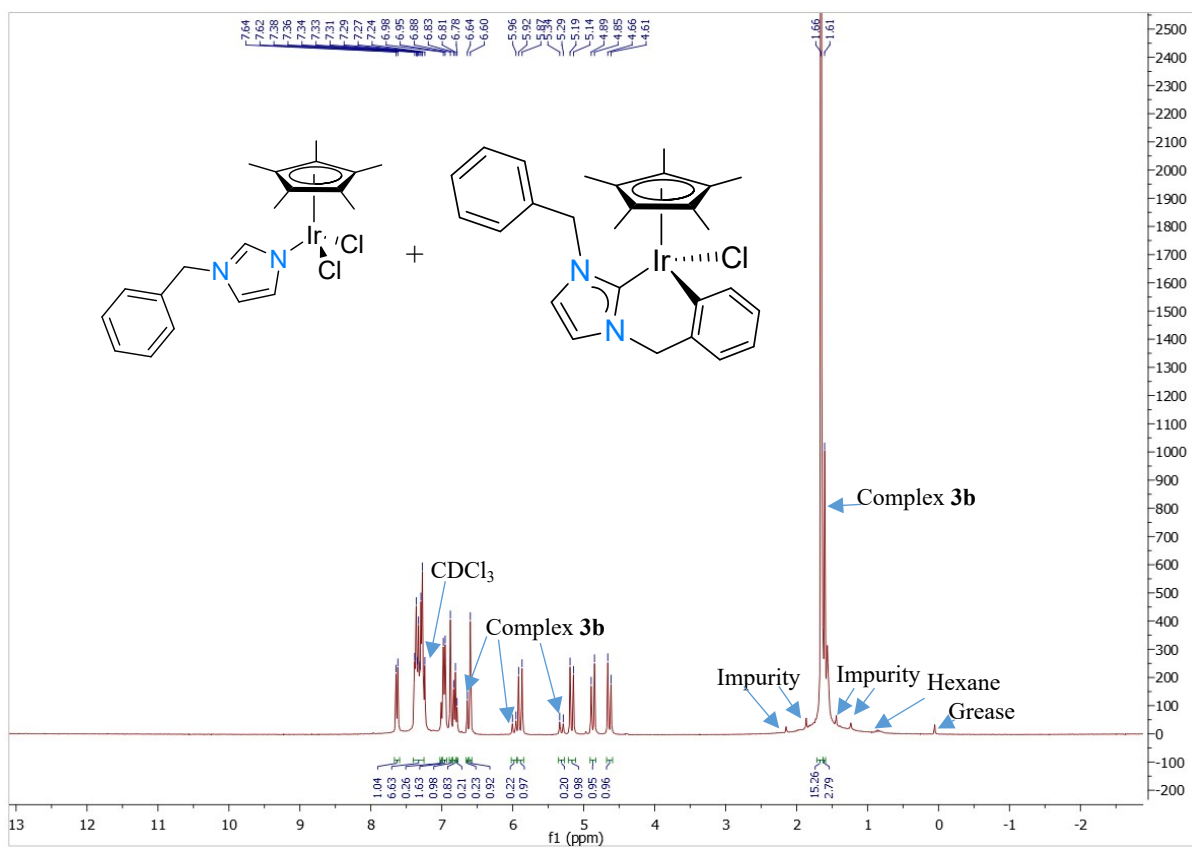

**Figure S9 Complex 4:  $^1\text{H}$  NMR spectrum**

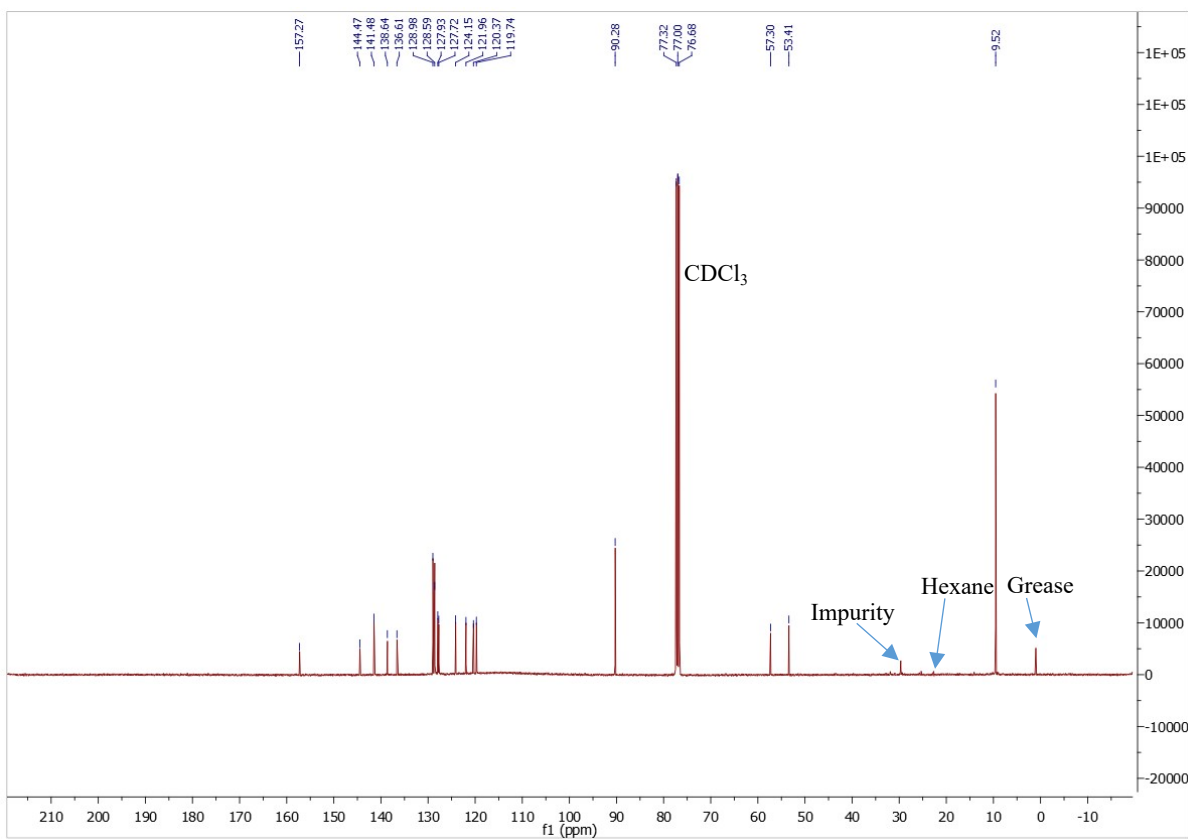

Figure S10 Complex 4:  $^{13}\text{C}$  NMR spectrum

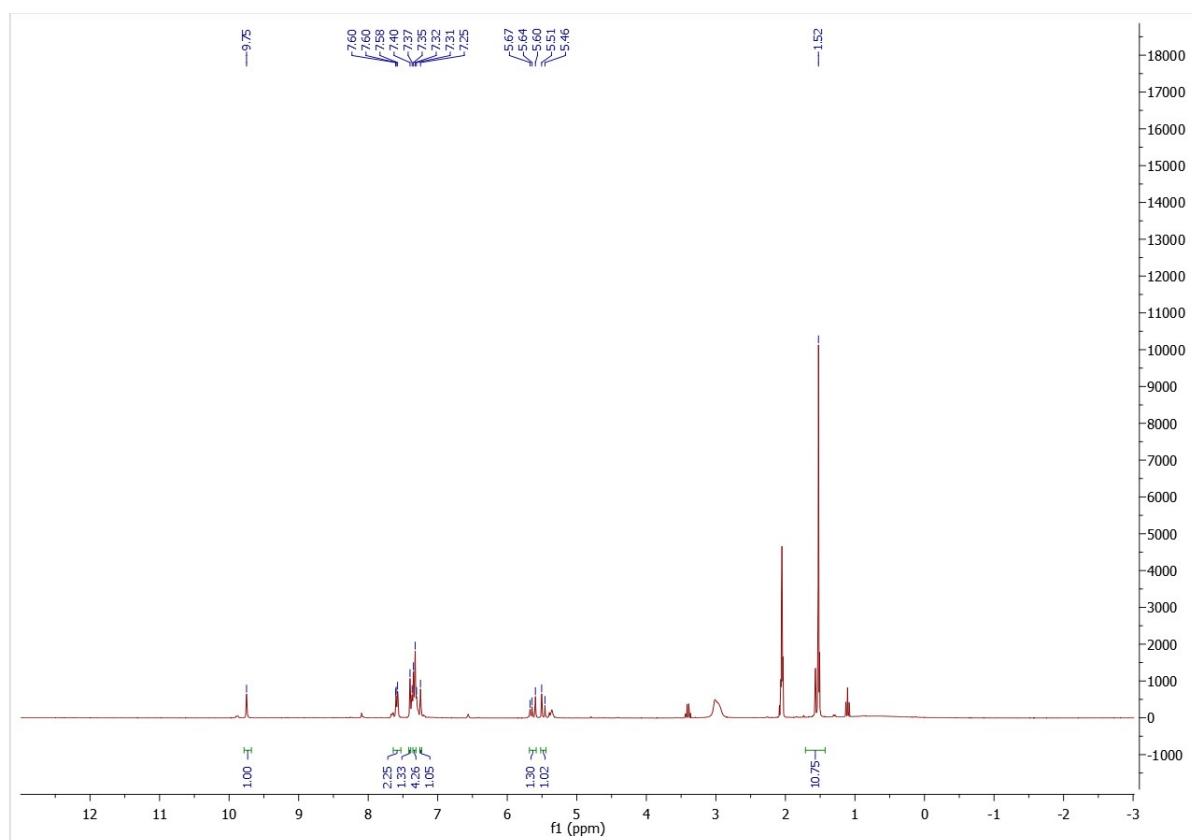

Figure S11 Complex 3b:  $^1\text{H}$  NMR spectrum

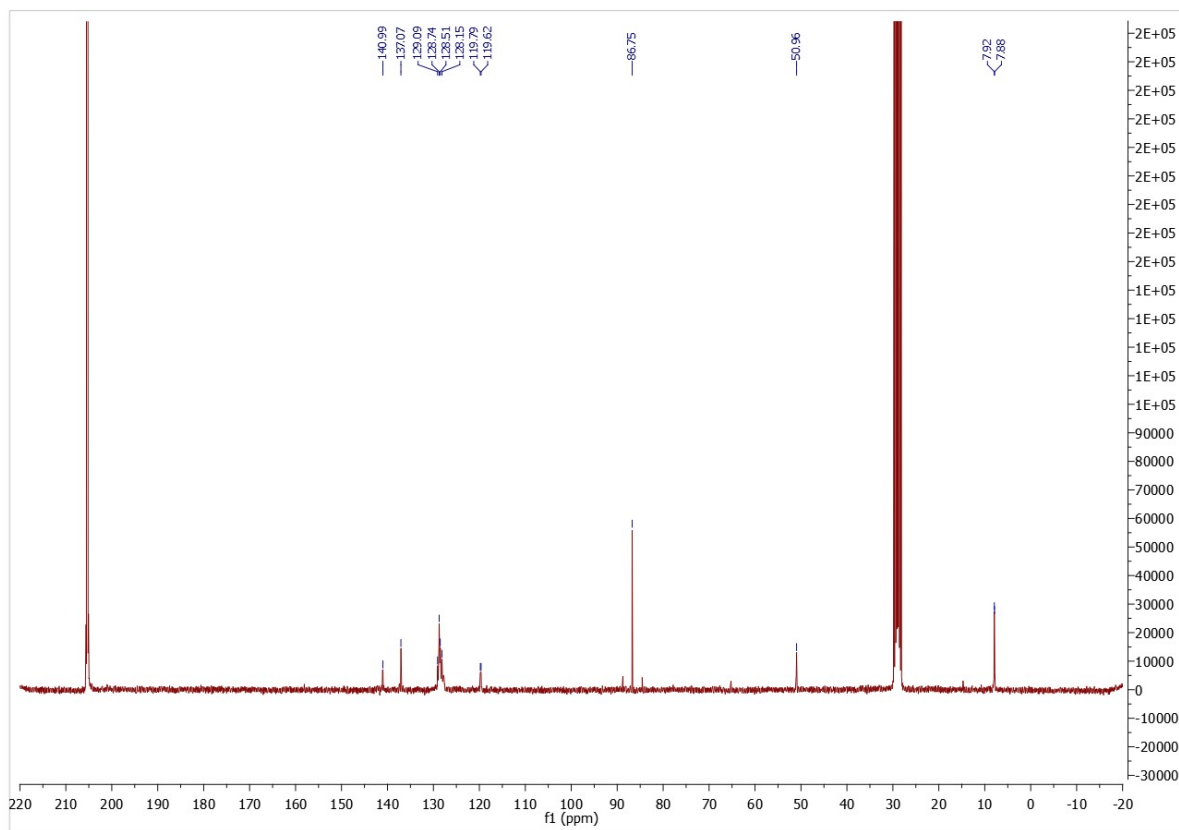

**Figure 12 Complex 3b:**  $^{13}\text{C}$  NMR spectrum

2. Crystallographic data and structure refinement parameters (Tables S1-S3).

**Table S1.** Crystal data and structure refinement for **1-4** and **1b**.

| Complex                                                | <b>1</b>                                                     | <b>1b</b>                                                  | <b>2</b>                                                   | <b>3</b>                                          | <b>4</b>                                          |
|--------------------------------------------------------|--------------------------------------------------------------|------------------------------------------------------------|------------------------------------------------------------|---------------------------------------------------|---------------------------------------------------|
| <b>Emp. formula</b>                                    | $\text{C}_{28}\text{H}_{40}\text{N}_2\text{Cl}_2\text{Ir}_2$ | $\text{C}_{14}\text{H}_{21}\text{N}_2\text{Cl}_2\text{Ir}$ | $\text{C}_{20}\text{H}_{31}\text{N}_2\text{Cl}_2\text{Ir}$ | $\text{C}_{24}\text{H}_{30}\text{N}_2\text{ClIr}$ | $\text{C}_{27}\text{H}_{30}\text{N}_2\text{ClIr}$ |
| <b>CCDC Identifier</b>                                 | 2079421                                                      | 2079420                                                    | 2079418                                                    | 2079419                                           | 2079422                                           |
| <b>Form. weight (g.mol<sup>-1</sup>)</b>               | 859.96                                                       | 480.43                                                     | 562.57                                                     | 574.17                                            | 610.20                                            |
| <b>Crystal system</b>                                  | monoclinic                                                   | monoclinic                                                 | triclinic                                                  | orthorhombic                                      | monoclinic                                        |
| <b>Space group</b>                                     | <i>C2/c</i>                                                  | <i>C2/c</i>                                                | <i>P-1</i>                                                 | <i>Pca2<sub>1</sub></i>                           | <i>P2<sub>1</sub>/c</i>                           |
| <b>Crystal descr.</b>                                  | yellow blade                                                 | yellow block                                               | yellow blade                                               | yellow block                                      | yellow rod                                        |
| <b>a (Å)</b>                                           | 35.6540(4)                                                   | 8.44700(10)                                                | 8.9646(2)                                                  | 23.81220(10)                                      | 8.89560(10)                                       |
| <b>b (Å)</b>                                           | 8.49960(10)                                                  | 15.3306(2)                                                 | 9.4002(2)                                                  | 8.6736(10)                                        | 26.1325(3)                                        |
| <b>c (Å)</b>                                           | 22.7872(2)                                                   | 24.2878(3)                                                 | 13.4196(3)                                                 | 21.15360(10)                                      | 20.4863(2)                                        |
| <b>α (°)</b>                                           | 90                                                           | 90                                                         | 73.897(2)                                                  | 90                                                | 90                                                |
| <b>β (°)</b>                                           | 127.3400(10)                                                 | 94.4640(10)                                                | 86.405(2)                                                  | 90                                                | 90.2520(10)                                       |
| <b>γ (°)</b>                                           | 90                                                           | 90                                                         | 78.889(2)                                                  | 90                                                | 90                                                |
| <b>Volume (Å<sup>3</sup>)</b>                          | 5490.25(12)                                                  | 3135.67(7)                                                 | 1066.07(4)                                                 | 4369.21(3)                                        | 4762.29(9)                                        |
| <b>Z</b>                                               | 8                                                            | 8                                                          | 2                                                          | 8                                                 | 8                                                 |
| <b>Abs. coeff. (m.mm<sup>-1</sup>)</b>                 | 20.424                                                       | 19.517                                                     | 14.454                                                     | 13.031                                            | 11.993                                            |
| <b>F(000)</b>                                          | 3279.0                                                       | 1840.0                                                     | 552.0                                                      | 2256.0                                            | 2396.0                                            |
| <b>Independent refl.</b>                               | 5402                                                         | 3098                                                       | 4436                                                       | 8500                                              | 9253                                              |
| <b>Completeness (%)</b>                                | 99.8                                                         | 100                                                        | 100                                                        | 99.2                                              | 95.9                                              |
| <b>Data/Restr/Para</b>                                 | 5402/0/318                                                   | 3098/30/178                                                | 4436/0/234                                                 | 8500/1/520                                        | 9253/245/665                                      |
| <b>Goodness of fit on F<sup>2</sup></b>                | 1.066                                                        | 1.084                                                      | 1.127                                                      | 1.042                                             | 1.296                                             |
| <b>Final R<sub>1</sub> indexes</b>                     | 0.0485                                                       | 0.0453                                                     | 0.0265                                                     | 0.0223                                            | 0.0584                                            |
| <b>wR<sub>2</sub> indices (all data)</b>               | 0.1437                                                       | 0.1098                                                     | 0.0687                                                     | 0.0575                                            | 0.1495                                            |
| <b>Largest diffr. peak and hole (e.Å<sup>-3</sup>)</b> | 3.94/-1.96                                                   | 2.11/-1.46                                                 | 1.14/-1.95                                                 | 1.36/-0.81                                        | 2.36/-1.47                                        |



**Table S3.** Selected bond lengths (Å) and angles (°) for **1-4** and **1b**.

| Description                               | <b>1</b>                | <b>1b</b>             | <b>2</b>               | <b>3</b>              | <b>4</b>                |
|-------------------------------------------|-------------------------|-----------------------|------------------------|-----------------------|-------------------------|
| <b>Cp*<sub>cent</sub>-Ir1<sup>a</sup></b> | 1.837(6) <sup>b</sup>   | 1.812(8)              | 1.775(5)               | 1.854(9)              | 1.857(10)               |
| <b>Ir1-Cl1</b>                            | 2.4134(17) <sup>c</sup> | 2.411(2) <sup>e</sup> | 2.4171(9) <sup>f</sup> | 2.4273(14)            | 2.423(3)                |
| <b>Ir1-C2</b>                             | 2.026(8)                | 2.031(7)              | -                      | 1.997(6)              | 1.999(11)               |
| <b>Ir1-C7</b>                             | 2.117(6)                | -                     | -                      | 2.073(6)              | 2.058(11)               |
| <b>Ir1-N1</b>                             | -                       | -                     | 2.120(3)               | -                     | -                       |
| <b>C6-C7</b>                              | 1.459(9)                | -                     | 1.319(6)               | 1.394(10)             | 1.410(17)               |
| <b>C6-C8</b>                              | 1.432(9)                | -                     | 1.503(6)               | -                     | -                       |
| <b>C6-C5</b>                              | 1.447(8)                | -                     | 1.510(5)               | 1.501(10)             | 1.512(18)               |
| <b>Ir2-C5<sup>d</sup></b>                 | 2.124(5)                | -                     | -                      | -                     | -                       |
| <b>Ir1-C7-C6</b>                          | 107.5(4)                | -                     | -                      | 124.1(5)              | 122.5(8)                |
| <b>C7-C6-C8</b>                           | 127.6(6)                | -                     | 123.8(4)               | 117.0(6) <sup>g</sup> | 116.6(11) <sup>g</sup>  |
| <b>C5-C6-C7</b>                           | 120.8(5)                | -                     | 123.7(4)               | 120.4(6)              | 120.8(10)               |
| <b>N2-C5-C6</b>                           | 115.4(5)                | -                     | 113.7(3)               | 111.8(6)              | 112.0(9)                |
| <b>C2-Ir1-C7</b>                          | 81.0(3)                 | -                     | -                      | 85.4(3)               | 85.5(4)                 |
| <b>Cl1-Ir1-Cl2</b>                        | -                       | 87.43(10)             | 87.45(3)               | -                     | -                       |
| <b>Cl1-Ir1-C2</b>                         | 90.15(19)               | 89.0(2)               | -                      | 90.59(17)             | 89.5(3)                 |
| <b>Cl1-Ir1-C7</b>                         | 86.76(19)               | -                     | -                      | 87.26(18)             | 87.9(3)                 |
| <b>Ir1-C7-C6-C5</b>                       | 60.2(7)                 | -                     | -                      | 1.0(9)                | 8.2(15)                 |
| <b>C7-C6-C5-N2</b>                        | -3.5(8)                 | -                     | 0.7(6)                 | -47.1(9)              | 41.6(15)                |
| <b>Ir1-C2-N2-C5</b>                       | 6.2(9)                  | -                     | -                      | -1.2(9)               | 0.6(15)                 |
| <b>C2-N2-C5-C6</b>                        | -35.8(9)                | -                     | -99.2(5)               | 48.7(9)               | -47.8(15)               |
| <b>N2-C5-C6-C8</b>                        | -179.4(5)               | -                     | -179.5(4)              | 134.4(7) <sup>h</sup> | -139.6(11) <sup>h</sup> |

<sup>a</sup> Cp\*<sub>cent</sub> = centroid of Cp\* ligand. <sup>b</sup> Ir2-Cp\*<sub>cent</sub> = 1.826(6) Å. <sup>c</sup> Ir2-Cl2 = 2.4052(17) Å. <sup>d</sup> Ir2-C6 = 2.213(6) Å. Ir2-C8 = 2.191(6) Å. <sup>e</sup> Ir1-Cl2 = 2.422(2) Å. <sup>f</sup> Ir-Cl2 = 2.4115(9) Å. <sup>g</sup> Refers to the C6-C7-C8 bond angle. <sup>h</sup> Refers to the N2-C5-C6-C11 torsion angle.

### 3. Conversion versus time plot using **3** (Graph S1).

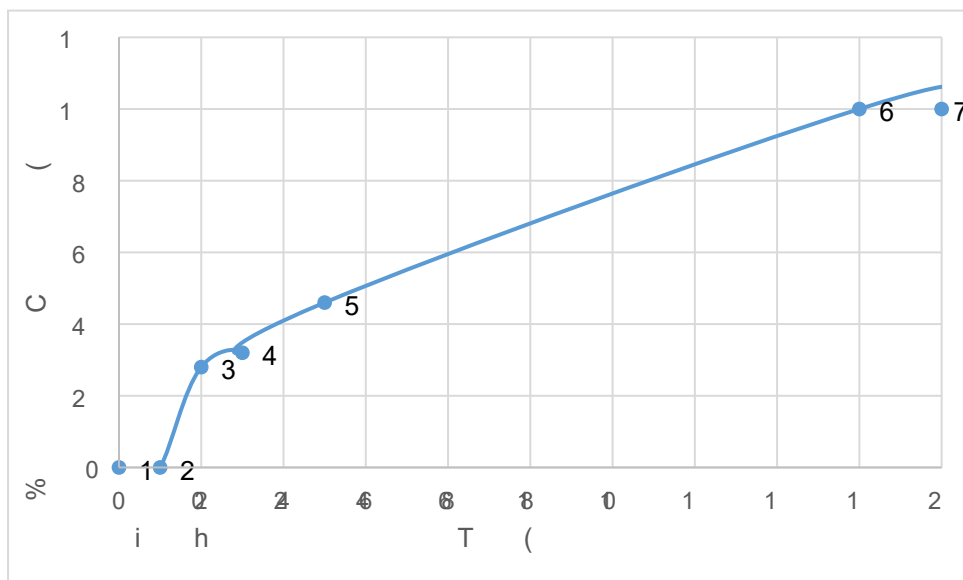

**Graph S1.** Conversion versus time plot in the transfer hydrogenation using <sup>i</sup>PrOH as hydrogen source at 110°C utilising **3** with acetophenone. General reaction conditions: Ketone/Aldehyde (0.6 mmol), <sup>i</sup>PrOH (10 mL), base (10 mol%), anisole (0.6 mmol), reflux.

#### 4. $^1\text{H}$ NMR spectrum of catalysis reaction mixtures

Time = 1h

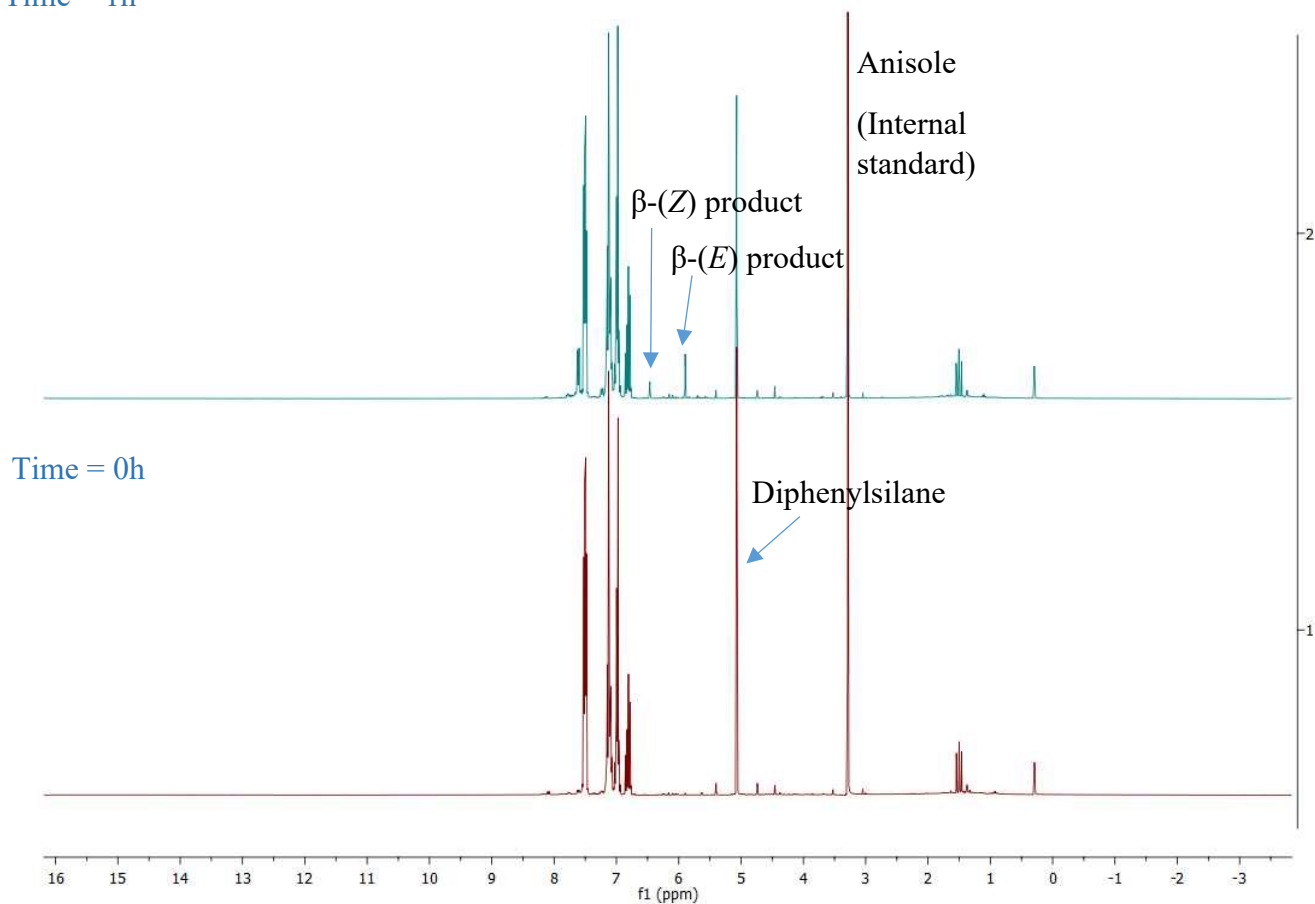

**Figure S13**  $^1\text{H}$  NMR spectrum of hydrosilylation catalysis of diphenylacetylene using **3** + **3b** obtained in  $\text{C}_6\text{D}_6$ . General conditions: PhCCPh (18 mg, 0.1 mmol),  $\text{H}_2\text{SiPh}_2$  (20  $\mu\text{L}$ , 0.1 mmol), **3** + **3b** (4 mol%), anisole (11  $\mu\text{l}$ , 0.11 mmol),  $\text{C}_6\text{D}_6$ , 80  $^\circ\text{C}$ , 1 hour.

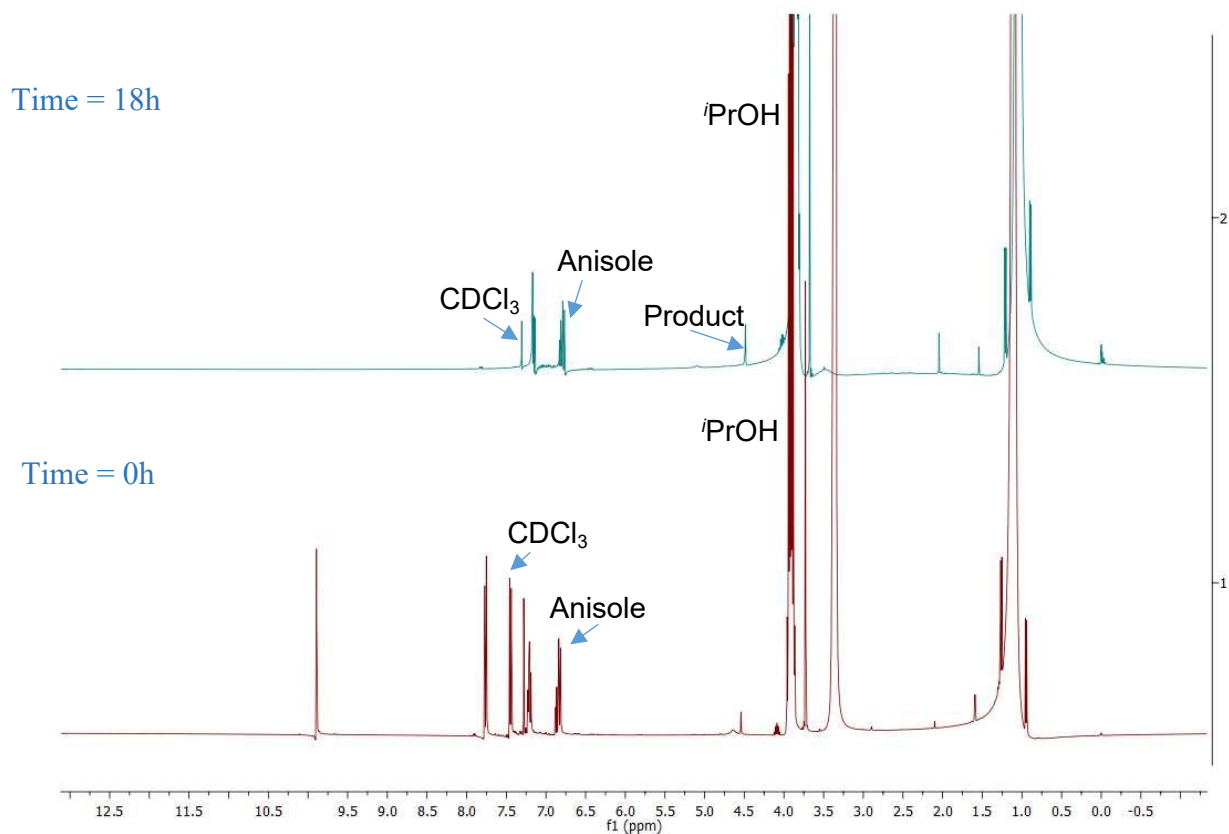

**Figure S14**  $^1\text{H}$  NMR spectrum of transfer hydrogenation catalysis of nitrobenzaldehyde using **3** obtained in  $\text{CDCl}_3$ . General reaction conditions: Ketone/Aldehyde (0.6 mmol), *i*PrOH (10 mL), base (10 mol%), anisole (0.6 mmol), reflux.

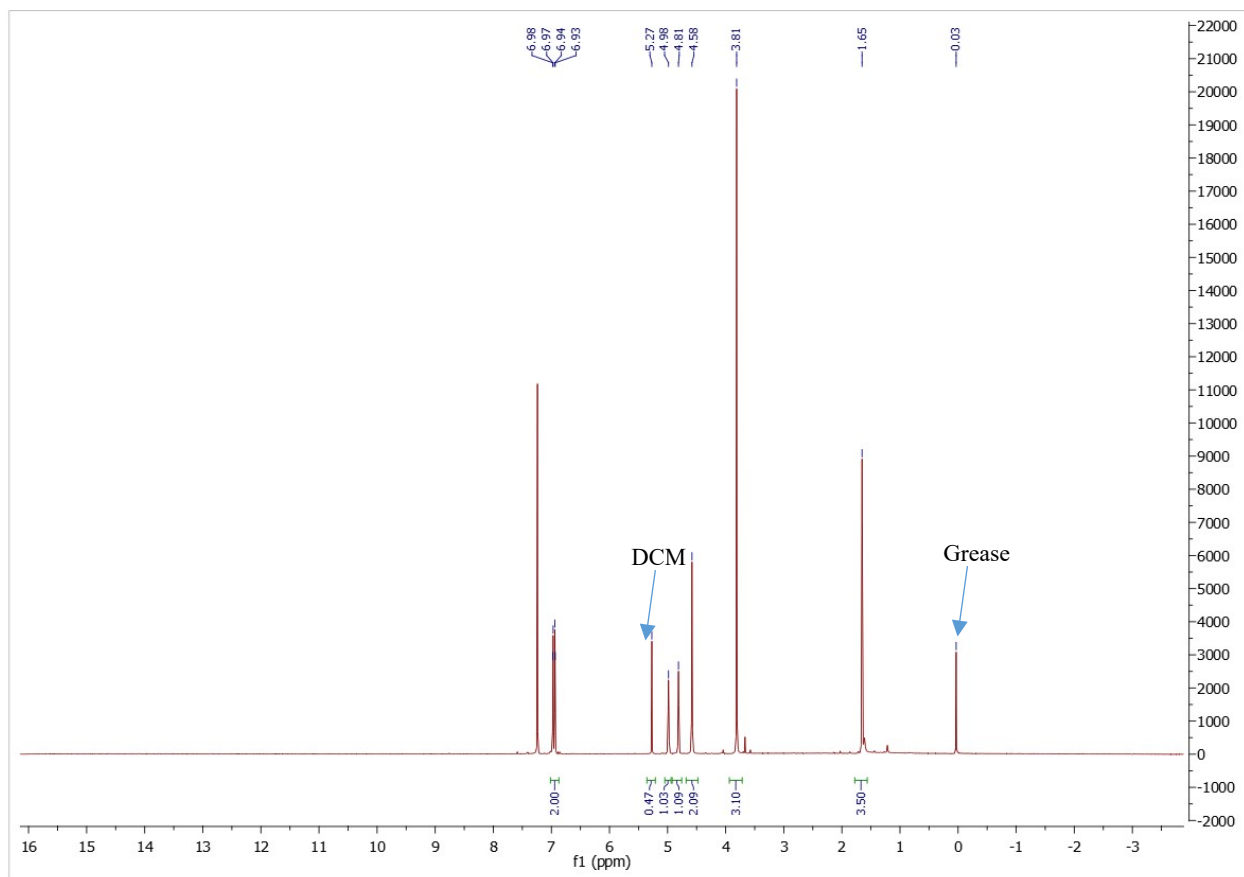

**Figure S15**  $^1\text{H}$  NMR spectrum of silver biscarbene formed from L1

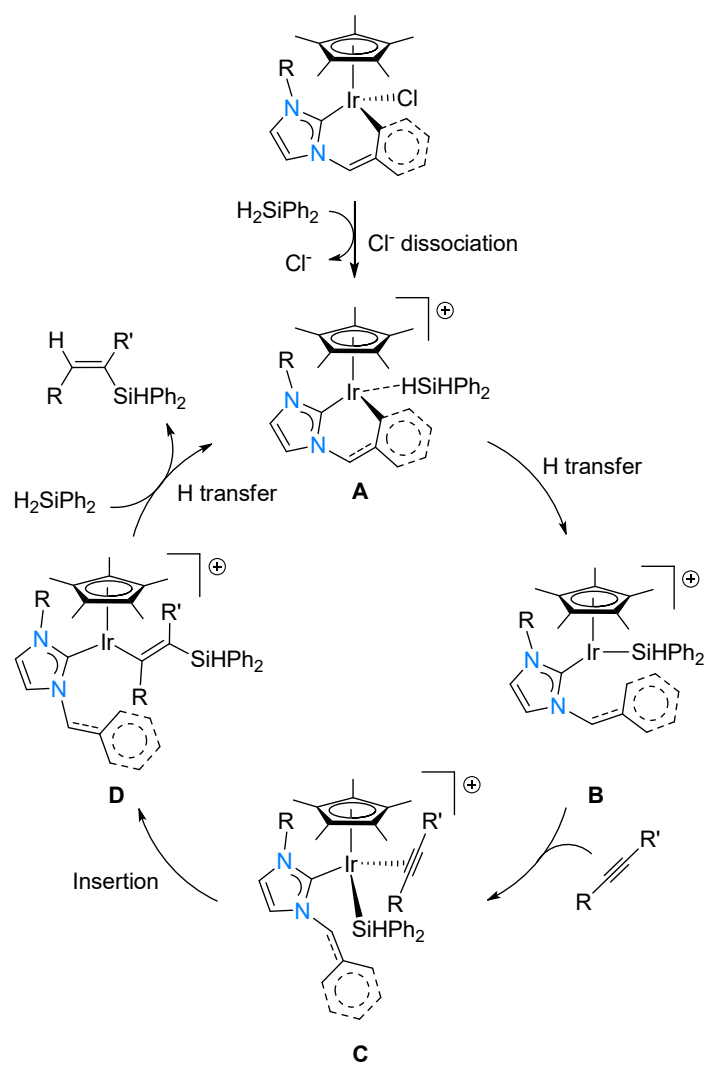

**Figure S16** Proposed mechanism for the hydrosilylation using Ir(III) catalysts
